# Supplementary material for: Novel Microsatellite Markers Acquired from Rubus coreanus Miq. and Cross-Amplification in Other Rubus Species
Source: Molecules. 2015 Apr 10;20(4):6432–42. doi: 10.3390/molecules20046432 (PMC6272785; doi:10.3390/molecules20046432)
Supplement: Supplementary file 1 [file molecules-20-06432-s001.xlsx]

## Sheet: Supplementary1.
Primer	Genebank No	Forward	Reverse	R. motif	R. cs	R. cs	R. cs	R. p	R. p	R. c	R. c	R. c	R. c	R. u	R. f	R. f	R. f	R. i	R. i	R. i	Transferabiltiy
GB-RC-002	KF776427	AAAAGCGCTTGTATGCCA	TTACGCAGTCCGCATTTT	(GA)7	-	-	-	-	-	-	-	-	-	-	-	-	-	-	-	-	0
GB-RC-006	KF776428	AAACCTTGTTTTGAACCGC	AAAGGGGGTGGATTAGCA	(GA)16	-	+	-	+	+	-	+	+	+	+	+	+	+	+	+	+	81.3
GB-RC-008	KF776429	AAATGAAAGCCGAGCACA	GCAAAGCGAAAATGGAAA	(GAA)6	+	+	+	+	+	+	+	+	+	+	+	+	+	+	+	+	100
GB-RC-012	KF776430	AACCCAAGCCCAAGGTTA	GGAGCGGCTGAAAAGATT	(CT)11	-	-	-	+	+	-	-	-	-	+	+	+	+	+	+	+	56.3
GB-RC-013	KF776431	AACCCCTCCGGAAGAAAT	TACGGAGATATCGTCGCC	(CTTT)3	+	+	-	+	+	+	+	+	+	+	+	+	+	+	+	+	93.8
GB-RC-014	KF776432	AACCGAATCGAGGCTACC	TCCATCAACGCTCAAAGC	(AG)22	+	-	+	+	-	+	+	-	-	-	+	+	+	+	-	-	56.3
GB-RC-018	KF776433	AAGAAGCCATGGGAGAGG	CGTCGCAATCATTACCAAA	(GAA)9	+	+	+	+	+	+	+	+	+	+	+	+	+	+	+	+	100
GB-RC-020*	JX976551	AAGCAATAATGGGTGGATCA	AATGGGAAGGCTGCAACT	(GAA)9	+	+	+	+	+	-	-	-	-	+	+	-	+	-	-	-	50
GB-RC-021	KF776434	AAGCCATGGTGTACATGC	ACCTCGCTCCCATCTGTT	(CAG)8	+	+	+	+	+	+	-	+	+	+	+	+	+	+	+	+	93.8
GB-RC-024	KF776435	AAGCTTTAGGGTCCCACG	GTTAGTCGTCGTCGTCGC	(CA)3	+	-	+	+	+	+	-	-	+	+	+	+	+	+	+	+	81.3
GB-RC-031	KF776436	AATCACCTCCTTGAGGCAA	ACCCAGCTCTTGACTCCC	(AC)4	+	+	+	+	+	+	+	+	+	+	+	+	+	+	+	+	100
GB-RC-049*	JX976552	ACAAGGTTGGTGAATGCG	ATTGCACTCTTCCGCTCA	(GA)4	-	+	+	-	+	-	-	-	-	+	-	-	+	-	-	-	31.3
GB-RC-054	KF776437	ACATGTCCCCTGGTTGTG	GGGTTGCAGAAATTCCAA	(TCT)3	+	+	+	+	+	+	+	+	+	+	+	+	+	+	+	+	100
GB-RC-059	KF776438	ACCTGGAAATGCCCTGTT	GACTGCTTCTTTGCACGG	(GT)8	-	-	-	+	+	-	-	-	-	+	+	+	+	+	+	+	56.3
GB-RC-060	KF776439	ACCTGGATCCGACGAGTT	GCCCTACCCGAAAAAGAA	(CT)25	+	+	+	+	+	+	+	+	+	+	+	+	+	+	+	+	100
GB-RC-062*	JX976553	ACGACCCTTTGAATCGCT	GCGAGGCAAGTATTGGTG	(ATG)5	+	+	-	-	+	-	-	-	-	-	-	+	-	-	+	+	37.5
GB-RC-064	KF776440	ACGGCAACGATTGAGAGA	GGGAATGACAAATGGCAG	(ACC)5	+	+	+	+	+	+	+	+	+	+	-	+	-	+	+	+	87.5
GB-RC-065	KF776441	ACTTAATCCGCAGAGCCC	CGCAACGAACTTTGGAAG	(CT)9	+	+	+	+	+	+	+	+	+	+	+	-	+	+	+	+	93.8
GB-RC-066	KF776442	ACTTCTCCACGAGCCTCC	TTCATCGCCTCCAACAGT	(AG)3	+	+	+	+	+	-	-	+	-	+	+	-	+	+	+	+	75
GB-RC-067*	JX976554	AGAAGGTGTGCGAGACCC	AACCGTGTCACCGTGAAG	(AG)19	-	-	-	-	-	-	-	-	-	-	-	-	-	-	-	-	0
GB-RC-069	KF776443	AGAATGCCGAACAGACCC	CAGAGGTAATTCAATGTGCG	(CA)9	-	-	-	-	-	-	-	-	-	-	-	-	-	-	-	-	0
GB-RC-072	KF776444	AGAGAGTGGCCGTGAACA	ACTTTGTCCAGGGGGAGA	(TC)13	-	+	-	+	+	-	-	-	-	-	-	-	-	-	-	-	18.8
GB-RC-073	KF776445	AGAGGCACAAAGAGTGCG	TTTTGTTTTGGTGGGCTG	(GGT)3,(GA)4	+	+	-	+	+	+	+	+	+	+	+	+	+	+	+	+	93.8
GB-RC-074*	JX976555	AGAGTGGCCCTAGCCTTG	ACCCGATGAAGCTGGTTT	(AG)15	+	+	+	+	+	+	+	+	+	+	+	+	+	+	+	-	93.8
GB-RC-075	KF776446	AGCAAAATGCATTCAAGAGG	CATGGAATTCCCACGATCT	(CT)18	-	-	+	+	+	-	-	-	-	+	-	+	-	+	+	+	50
GB-RC-077*	JX976557	AGCACCCTCTAAACCCGA	TGCTCATATATAATCGATGTGCTT	(AAC)9	+	+	+	+	+	+	+	+	+	+	+	+	+	+	+	-	93.8
GB-RC-078*	JX976558	AGCAGCATCATCAGTTCCA	TGCTTGGTGACCTCTGCT	(GCA)6	-	+	-	+	+	+	+	+	+	+	-	+	+	+	+	+	81.3
GB-RC-080	KF776447	AGCCTTTCCTCCAAGCAC	GGAAATGGAAATTGGAACG	(CTT)4	+	+	-	+	+	+	+	+	+	+	+	+	+	+	+	+	93.8
GB-RC-083	KF776448	AGGACGGGTCCTGTCAGT	GACCAGAGACGGGCTAGG	(AG)11	+	+	+	+	+	+	+	+	+	+	+	+	+	+	+	+	100
GB-RC-086	KF776449	ATAGGCCCAGCCCAATGT	CTTGTCATAGTGGCGCGT	(TC)6	+	+	+	+	+	+	+	+	+	+	+	+	+	+	+	+	100
GB-RC-091*	JX976559	ATCCCGAAAACCACCATT	CCTCTCTCTCCCCGTGAA	(AG)15	+	-	+	+	+	+	+	+	+	+	-	-	+	+	+	+	81.3
GB-RC-097	KF776450	ATGCCGCACATGTCTCTC	GTCCCCCGAGATCGT	(TG)59	+	+	+	+	+	+	+	+	+	+	+	+	+	+	+	+	100
GB-RC-098*	JX976560	ATGCCTCGATTGCAGAGA	GAACTCACAGCAGGTCGC	(GCA)4	+	+	+	+	+	+	+	+	+	+	+	+	+	+	+	+	100
GB-RC-099	KF776451	ATGGCCACAAACATGTGC	TAGCGAGAGCGCGTACA	(GA)36	-	-	-	+	+	-	-	+	-	+	-	+	+	+	+	+	56.3
GB-RC-100*	JX976561	ATGTGCAGCAGCAGTGAA	CTGGGTCCATCCACATTG	(AG)6	+	+	+	+	+	+	+	+	+	+	+	+	+	+	+	+	100
GB-RC-103	KF776452	ATGTTGCGATTGGAAGGA	ACGTGCAAAATGAGGTGG	(GA)11	+	+	+	+	+	+	-	+	+	+	+	+	+	+	+	+	93.8
GB-RC-105*	JX976562	ATTAAACCTCACCGGCGT	CAAGGCTTGTCAATTCGG	(GT)8	-	+	+	+	+	+	+	+	+	+	+	+	+	+	+	+	93.8
GB-RC-106*	KF776453	ATTGGACTTGGGGTTTGC	ATCAAGGATCGATGGGCT	(AC)7	+	+	+	+	+	+	-	+	+	+	+	+	+	+	+	+	93.8
GB-RC-109*	JX976563	CAAGAGTTGCATCGGCTC	TGTTGAAACTTTGCCATGC	(TC)12	+	+	+	+	+	+	+	+	+	+	-	+	+	+	+	-	87.5
GB-RC-111*	JX976564	CAAGGCTTGTCAATTCGG	ATTAAACCTCACCGGCGT	(CA)11	+	+	+	+	+	+	+	+	+	+	+	+	+	+	+	-	93.8
GB-RC-113	KF776454	CACACACACACTCTCTGAGAAAA	ATATGCACGTGTGTGCCA	(TC)8	+	+	+	+	+	+	+	+	+	+	+	+	+	+	+	+	100
GB-RC-115	KF776455	CACATGAGGCCTAGGGAA	GGCTGTGAGCAGGAACAC	(CT)10	+	+	+	+	+	+	+	+	+	+	+	+	+	+	+	+	100
GB-RC-117	KF776456	CACGATCAACGCTTCTTTG	TGCGCCTATTGGATTCAC	(CAG)4	+	+	+	+	+	-	+	+	+	+	+	+	+	+	+	+	93.8
GB-RC-121	KF776457	CAGATCATAAGAAAGGGAGCA	TGTGGACAGCAGAGATTGG	(CT)16	+	+	+	+	+	+	+	+	+	+	+	+	+	+	+	+	100
GB-RC-127	KF776458	CAGTCAAAATTTGCAAAGAA	GTTTTTCCGTCGGTCCTC	(TC)5	+	-	-	+	+	-	-	-	-	+	-	+	+	+	+	+	56.3
GB-RC-128	KF776459	CATCAATATGATCATGAAGAAGA	AATCCCACCATCTGGTCC	(AGCT)3	+	-	-	+	+	-	-	-	-	+	+	+	+	+	+	+	62.5
GB-RC-130	KF776460	CATTGATGGGCCAAGAGA	TTTCGCAGGAATGGAAGA	(GGA)4	+	+	+	+	+	+	+	+	+	+	+	+	+	+	+	+	100
GB-RC-134	KF776461	CATTGGGGTGTGTTTTGG	AATGCTCCACTCACCCCT	(GAAA)2, (GAAA)2	-	-	-	-	-	-	-	-	-	+	-	+	-	+	+	+	31.3
GB-RC-135	KF776462	CCAAACGCGGTTCAAAT	AAATCCAATCCAATCCAGTTT	(CT)3,(CT)3	-	-	-	+	+	-	-	-	-	+	+	+	+	+	+	+	56.3
GB-RC-137	KF776463	CCAATCAGCAGTGAAGCTG	TGGTCGTCTTGTCTTTGACTC	(GA)4,(GA)2	+	+	+	+	+	+	+	+	+	+	+	+	+	+	+	+	100
GB-RC-138*	JX976565	CCACAAAACCAAGACCCA	AAGATAGATGAGGCCAGCG	(ACACTC)4	+	+	+	+	+	+	+	+	+	+	+	+	-	+	+	+	93.8
GB-RC-141*	JX976566	CCACAGAATGGGATTCATA	CTCGACTTGTCGCAGAGG	(GA)6	-	+	+	+	+	+	+	+	+	+	+	+	-	+	+	+	87.5
GB-RC-142	KF776464	CCACATTTTTCACCCAATTC	CAATGTCCAAGAACCCGA	(GGA)3	+	+	+	+	+	+	-	+	-	+	+	+	+	+	+	+	87.5
GB-RC-143*	JX976567	CCACGGAGGACGTAATGA	CAGTCCAACTTGCTTCCG	(AG)12	+	+	-	+	+	-	-	-	-	+	+	+	-	+	+	+	62.5
GB-RC-144	KF776465	CCACTGGAGAGGATGCAA	AATATGGGAGGGGTGTGG	(AG)22	-	-	-	+	+	+	-	+	-	+	+	+	+	+	+	+	68.8
GB-RC-145*	JX976568	CCATATGACACAGCCCAAA	CCATGCGACTTTACTGCC	(AC)9,(CAA)5	+	+	+	+	+	+	+	+	+	+	+	+	+	+	+	+	100
GB-RC-146	JX976569	CCATGTCCACTTCAACCC	ACTCCTCCGACGACCAAT	(CTT)5	+	+	+	+	+	+	+	+	+	+	+	+	+	+	+	+	100
GB-RC-149	KF776466	CCCACAACTTTCTTGGCA	ACAACGGAGGGTGAGGTT	(CGGCTG)4	+	+	+	+	+	-	-	-	-	+	-	+	+	+	+	+	68.8
GB-RC-150	KF776467	CCCATCGTTGTCGAGCTA	TTGGTGCACTCCATAGCC	(AG)10	+	+	+	+	+	+	+	+	+	+	+	+	+	+	+	+	100
GB-RC-151	KF776468	CCCATGAGATGGCGAGTA	TTCATGATCACCCAACCC	(GGA)3,(TG)3	+	+	+	+	+	+	+	+	+	+	+	+	-	+	+	+	93.8
GB-RC-153	KF776469	CCCCCTCCCTATGTTGAG	GCCAATGACCTTTGTTGC	(CAG)3	+	+	+	+	+	+	+	+	+	+	+	+	+	+	+	+	100
GB-RC-162	KF776470	CCGGGGATTTTCCTGATA	AATGGCTTCTTCCTTGGC	(AGG)8	+	+	+	+	+	+	-	+	+	+	+	+	+	+	+	+	93.8
GB-RC-166*	JX976570	CCTACGGCTTTGGTATGTT	CCCCCTTTCTCCTTCCTT	(TTGAAG)6	+	+	+	+	+	+	+	-	+	+	+	+	+	+	+	+	93.8
GB-RC-167*	JX976571	CCTCATTTGCAAAGGTTCT	GACCGAACCATGATGGAA	(TC)17	+	-	+	+	+	+	+	-	+	+	+	-	+	+	+	+	81.3
GB-RC-169	KF776471	CCTCTCCTCCATTAACTTGG	GGGATATTTGGTACGCACG	(AG)18	+	+	+	+	+	+	+	+	+	+	+	+	+	+	+	+	100
GB-RC-172	KF776472	CGAAAGCTCACTGCCTTC	GGGTCTTGGGGTGTGTTT	(CT)22	-	-	-	-	-	-	-	-	-	-	-	-	-	-	-	-	0
GB-RC-173	KF776473	CGACATGGTTTTCGCATT	ATGTGCGCATATGAAGGG	(AC)13	+	+	+	+	+	+	+	+	+	+	-	+	+	+	+	+	93.8
GB-RC-174	KF776474	CGAGAATCATATCTTGTCTGATGA	ATCTGTCCCTCCTGCACC	(GGA)5	+	+	+	+	+	+	+	+	+	+	+	+	+	+	+	+	100
GB-RC-175	KF776475	CGATGGGCTCCTTAATCC	CCGAAAACCCCAACATTT	(TG)4	+	+	+	+	+	+	+	+	+	+	+	+	+	+	+	+	100
GB-RC-178*	JX976572	CGCGCTAAACCACTTCAC	GTTGGAACAGCAGTGGGA	(CA)15	+	-	+	+	+	+	+	-	+	+	+	-	+	+	+	+	81.3
GB-RC-180	KF776476	CGGCTACCAGACGAAATG	TTGCAAATCGCATATCAGAC	(TA)4	+	-	-	+	+	-	-	-	-	-	-	-	-	-	-	-	18.8
GB-RC-181	KF776477	CGGCTTCACAAAGCAAAC	TTCTGTTCAATCCGGGC	(TTC)4	+	+	+	+	+	+	+	+	+	+	+	+	+	+	+	+	100
GB-RC-186*	JX976573	CGTCCAATGTCTATCCGC	CAGGCAACTGCGATCTTC	(TTG)5	+	-	+	+	+	+	+	-	+	+	+	-	+	+	+	+	81.3
GB-RC-191*	JX976574	CTCAATGGGAGCACCAAA	CCCTGCCCAATAAGCATT	(GA)6	+	+	+	+	+	+	+	+	+	+	-	+	+	+	+	+	93.8
GB-RC-193*	JX976575	CTCCCTGCAAAGAAAGCC	CTGGAATTCGCCCTTCTC	(GA)18	+	+	+	+	+	+	+	+	+	-	-	+	-	+	+	+	81.3
GB-RC-198	KF776478	CTGCCCACCCCTACTTTC	CAGACTGCCCTCATTTGC	(AG)10	-	-	-	+	+	-	-	-	-	+	-	-	+	-	-	-	25
GB-RC-202	KF776479	CTGGTCAGAGCACTTCGG	GACCTCCAGACCCTTTGC	(CAG)4	+	+	+	+	+	+	+	+	+	+	+	+	+	+	+	+	100
GB-RC-203	KF776480	CTGGTGAGCTCAAAACCG	TCCGGGAAAGAAAGAAGC	(CAT)3	+	-	+	+	+	+	+	+	+	+	+	+	+	+	+	+	93.8
GB-RC-205	KF776481	CTGTATGAGGCAGCAGGC	CCATGGAGGTGAAACCCT	(ATG)3	+	+	+	+	+	-	-	-	-	+	+	+	+	+	+	+	75
GB-RC-207*	JX976577	CTTAGCCAGAACGGGGAG	CTAACCGGCTGGCCTACT	(GA)10	-	-	-	-	-	-	-	-	-	-	-	-	-	-	-	-	0
GB-RC-210	KF776482	CTTCTGCATGACCAAGGG	ATGCCATCACCCTGTGAA	(TGA)3	-	-	-	+	+	-	-	-	-	+	+	+	+	+	+	+	56.3
GB-RC-211*	JX976578	CTTGGTGTGGATGCGATT	TTCCAGATTCGACCGTTG	(GGA)7	+	+	+	+	+	+	+	+	+	+	+	+	+	+	+	+	100
GB-RC-213	KF776483	CTTTCTGGGATTGGGAGG	TGCACTGTATGCTTTGCG	(AC)4	+	+	+	+	+	+	+	+	+	+	+	+	+	+	+	+	100
GB-RC-215	KF776484	GAACCGACACACACACCC	GGATGAAGTTTGGGAGGC	(AC)5	+	+	-	-	-	+	+	-	+	-	+	+	+	+	+	+	68.8
GB-RC-216	KF776485	GAACGGCTGATCTGTTGC	TAACAACTCCCGGCACC	(CA)5	+	+	+	+	+	-	-	-	+	+	+	+	+	+	+	+	81.3
GB-RC-217	KF776486	GAAGAGGCTGCTTTTTGCT	TTTTGAACCGGGAAGACC	(TGA)3,(AAC)3	-	-	-	-	-	-	-	-	-	-	-	-	-	-	-	-	0
GB-RC-219	KF776487	GAAGTCAATTGGCTCCAAAA	GGACCGCTATTCAGAGGG	(GT)16(AG)14	-	+	-	+	+	-	-	-	-	+	-	+	-	+	+	-	43.8
GB-RC-220*	JX976579	GAATCAGGGTGAAGGGGA	CCCCCTCTCTTCTTTTTGG	(GA)14	+	+	+	+	-	-	+	+	+	-	-	+	-	+	-	+	62.5
GB-RC-222	KF776488	GACCAGAGACGGGCTAGG	AGGACGGGTCCTGTCAGT	(TC)13	-	-	-	-	-	-	-	-	-	-	-	-	-	-	-	-	0
GB-RC-235	KF776489	GCATTCTCAATTGGCAAAA	CACTCATGTGCCTTTGCAT	(TG)15(AG)13	-	-	-	-	-	-	-	-	-	-	-	-	-	-	-	-	0
GB-RC-236	KF776490	GCCAAAATGCATTCCAAC	CCTCAACTTCCCGAATGA	(CAG)5	-	-	-	-	+	-	-	-	-	-	-	-	-	-	-	-	6.3
GB-RC-245*	JX976582	GCCTCAAGCTCACACAGG	GGTGCGTCCACAAACTGT	(AG)14	+	+	+	+	+	-	+	+	+	+	+	+	+	+	+	+	93.8
GB-RC-247*	JX976583	GCGCTATGGTCAGGTTGA	AAAGAAACGGTGGCCATT	(TTC)12	+	+	-	+	+	-	-	-	-	+	-	+	+	+	+	+	62.5
GB-RC-250	KF776491	GCGTCAAACGCAGCTTAG	GGAAAGCGAAAGAACATTGA	(TC)5,(TC)4	-	-	-	-	-	-	-	-	-	-	-	-	-	-	-	-	0
GB-RC-259*	JX976584	GGAAGGAATGCAATAGCCA	TCCCCCTGCTTCTGAGAT	(TG)8	+	+	-	+	+	+	-	+	-	-	-	+	-	-	-	-	43.8
GB-RC-261	KF776492	GGACCAGATGGTGGGATT	AGGCATGATCGTGGTCTG	(GTT)7	-	-	-	-	-	-	-	-	-	-	-	-	-	-	-	-	0
GB-RC-262	KF776493	GGACTAGTTCTCGGCGCT	TTCGGTAGCGAGATTGTGA	(CCT)3,(TCTA)3	-	-	-	-	-	-	-	-	-	-	-	-	-	-	-	-	0
Transferability (%)					71.1	68	63.9	83.5	84.5	60.8	56.7	59.8	61.9	79.4	66	76.3	73.2	80.4	79.4	75.3
Mean transferability (%)					67.7			84		59.8				79.4	71.8			78.4
* 29 polymorphic primers in Rubus coreanus
# Abbreviation: R.co; R. coreanus, R.cs; R. crataegifolius var. subcuneatus, R.p; R. parvifolius, R.c; R. crataegifolius, R.u; R. ursinus, R.f; R. fruticosus, R.i; R. idaeus
